# Supplementary material for: From microbial gene essentiality to novel antimicrobial drug targets
Source: PubMed Central journal article supplement (PMC4233050; doi:10.1186/1471-2164-15-958), 2014-11-05

Additional file 4| A line graph of the rarefaction analysis [Reference 13] on the transposon mutant libraries used in study. The probability that more essential genes are hit increases with the increase in mutant library saturation.

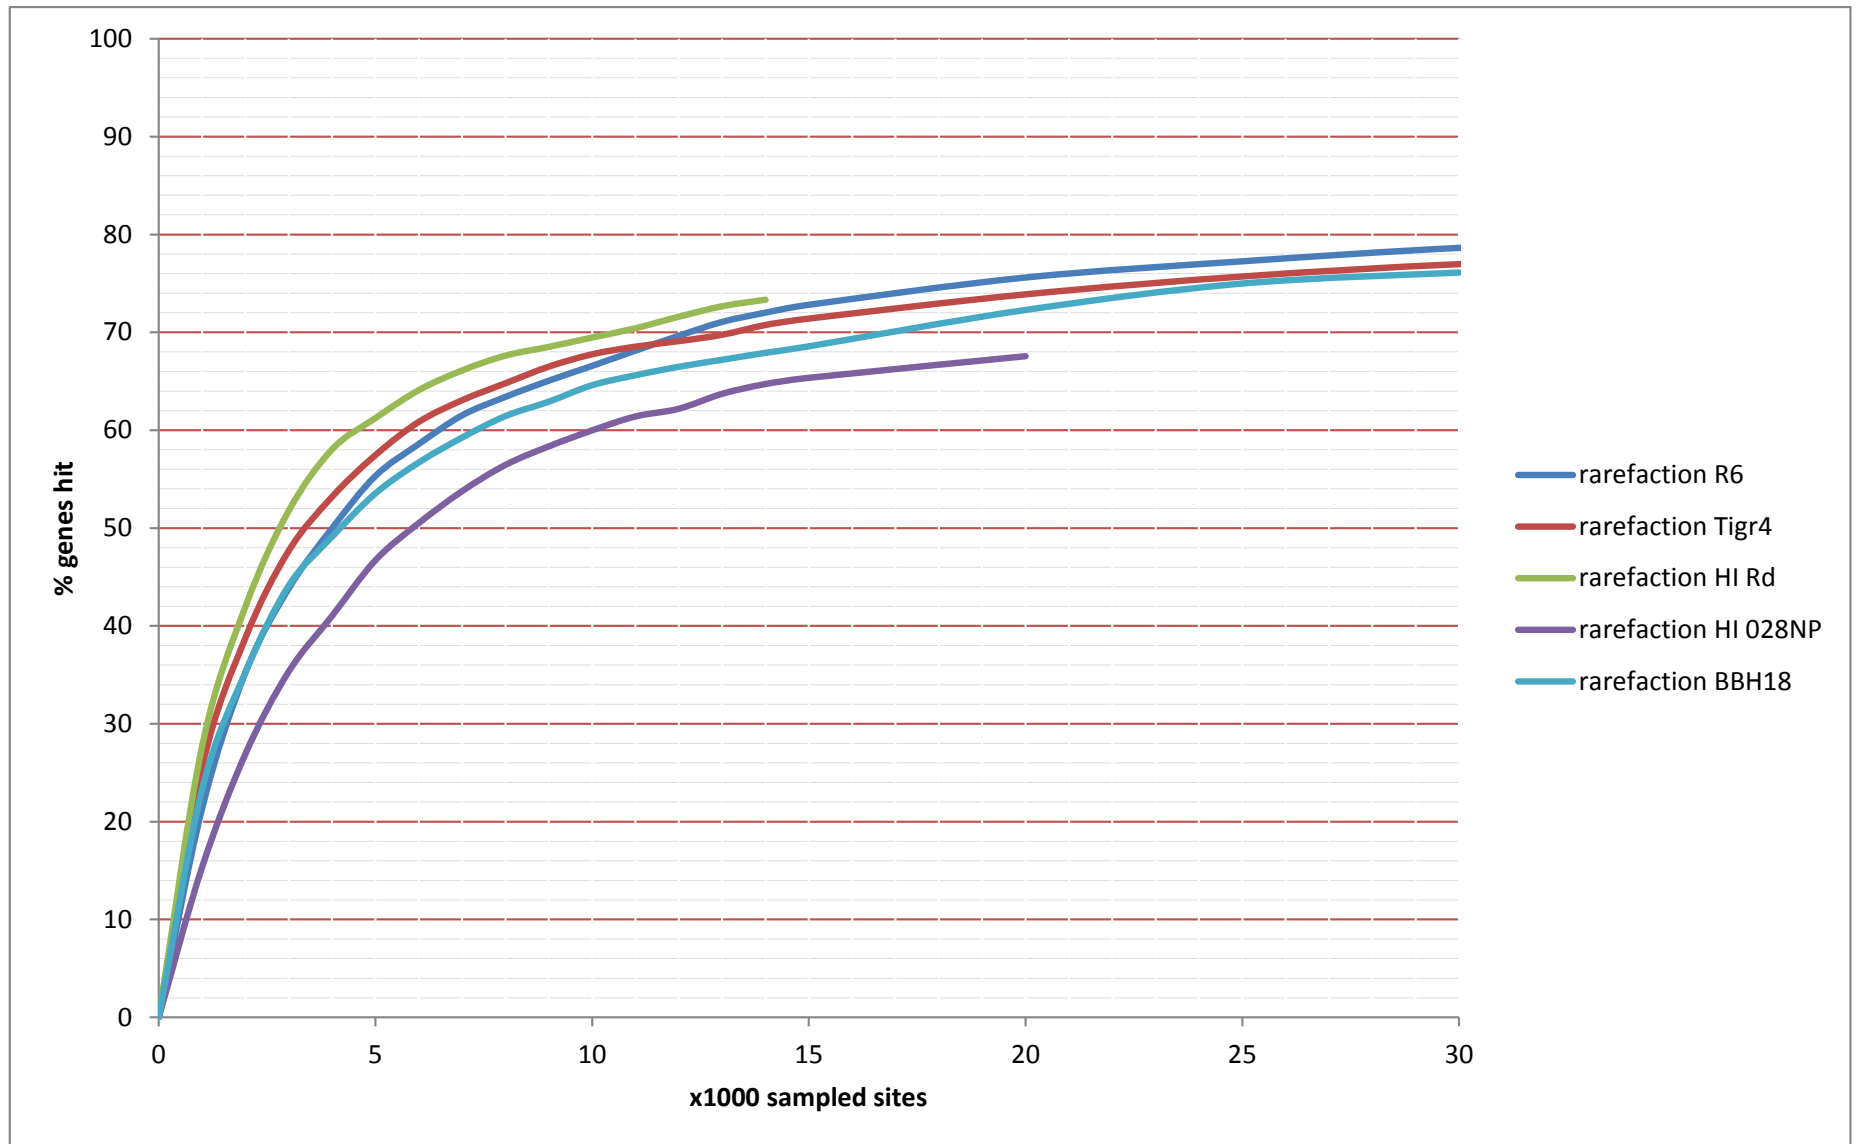

Supplement: 12864_2014_6655_MOESM2_ESM.pdf [file 12864_2014_6655_MOESM2_ESM.pdf]
